# Supplementary material
Source: publisher figshare collection journal article supplement (https://acs.figshare.com/ndownloader/files/4385968)
Supplement: Supplementary file 1 [file 4385968]

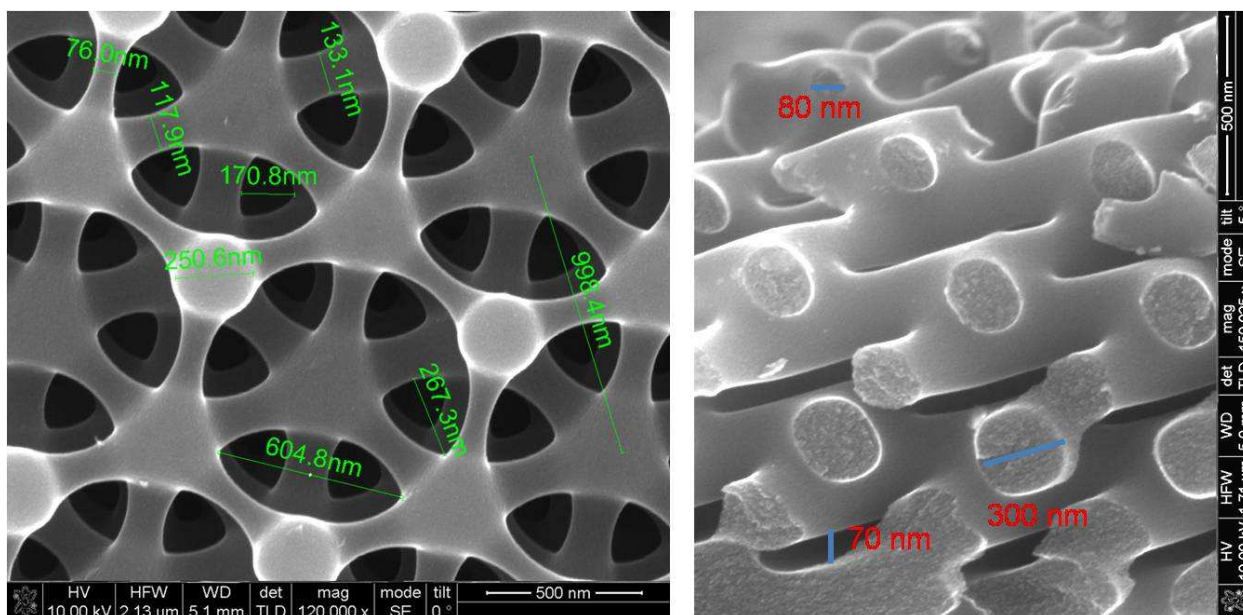

Figure S1. SEM images of top view (Left) and cross section view (Right) of the lithographically defined 3D carbon electrodes.

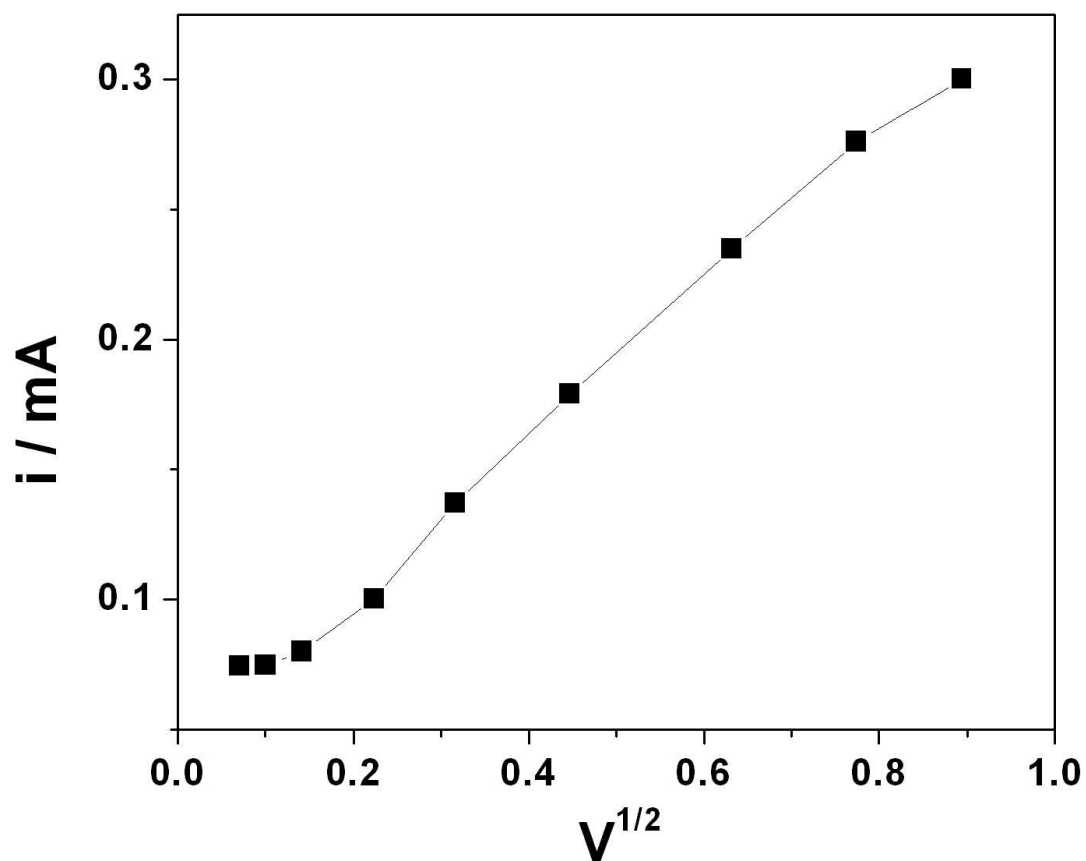

Figure S2. Plot of current ( $i$ ) versus square root of scan rate ( $v^{1/2}$ ) of 1 mM Ferrocene + 0.1 M TBATFB versus Ag/AgNO<sub>3</sub> and platinum reference and counter electrodes respectively.
